# Supplementary figures and images for: Absenteeism, unemployment and employment protection legislation: evidence from Italy
Source: Springer Nature journal article supplement (doi:10.1186/2193-8997-3-3), 2014-05-19

### (a) Absences of Small Firm Employees

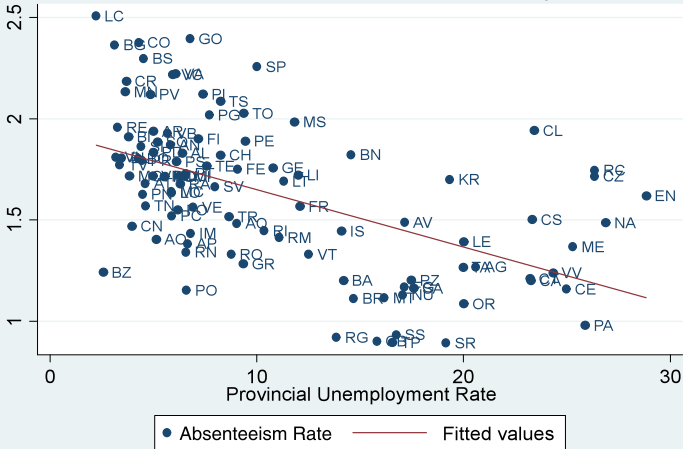

### (b) Absences of Large Firm Employees

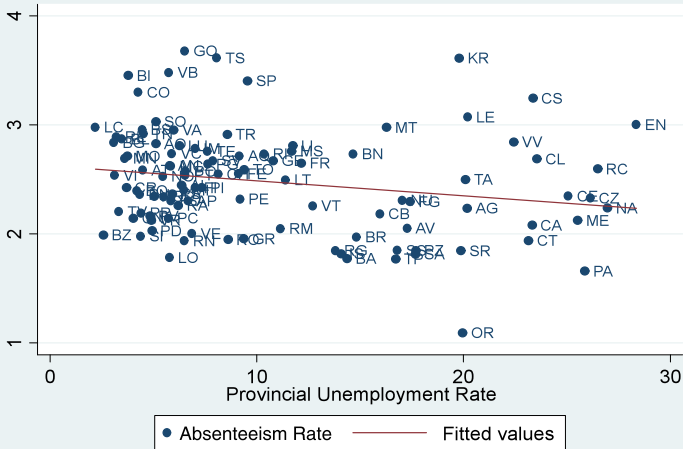

Supplement: 40172_2014_18_MOESM1_ESM.pdf [file 40172_2014_18_MOESM1_ESM.pdf]
